# Supplementary material for: The electronic structures of diruthenium complexes containing an oligo(phenylene ethynylene) bridging ligand, and some related molecular structures
Source: Royal Society of Chemistry journal article supplement (doi:10.1039/c0dt00809e), 2010-01-01
Supplement: c0dt00809e.pdf [file c0dt00809e.pdf]

Supporting Information

**The electronic structures of di-ruthenium complexes containing tris(*para*-phenyleneethynylene) links, and related molecular structures.**

Wan M. Khairul, Mark A. Fox, Phil A. Schauer, Dmitry S. Yufit, David Albesa-Jové, Judith A.K. Howard and Paul J. Low\*

<sup>a</sup> *Department of Chemistry, Durham University, South Rd, Durham, DH1 3LE, UK*

\* *Corresponding author: Tel +44 191 334 2114, fax +44 191 384 4737, Email [p.j.low@durham.ac.uk](mailto:p.j.low@durham.ac.uk) (P.J. Low)*

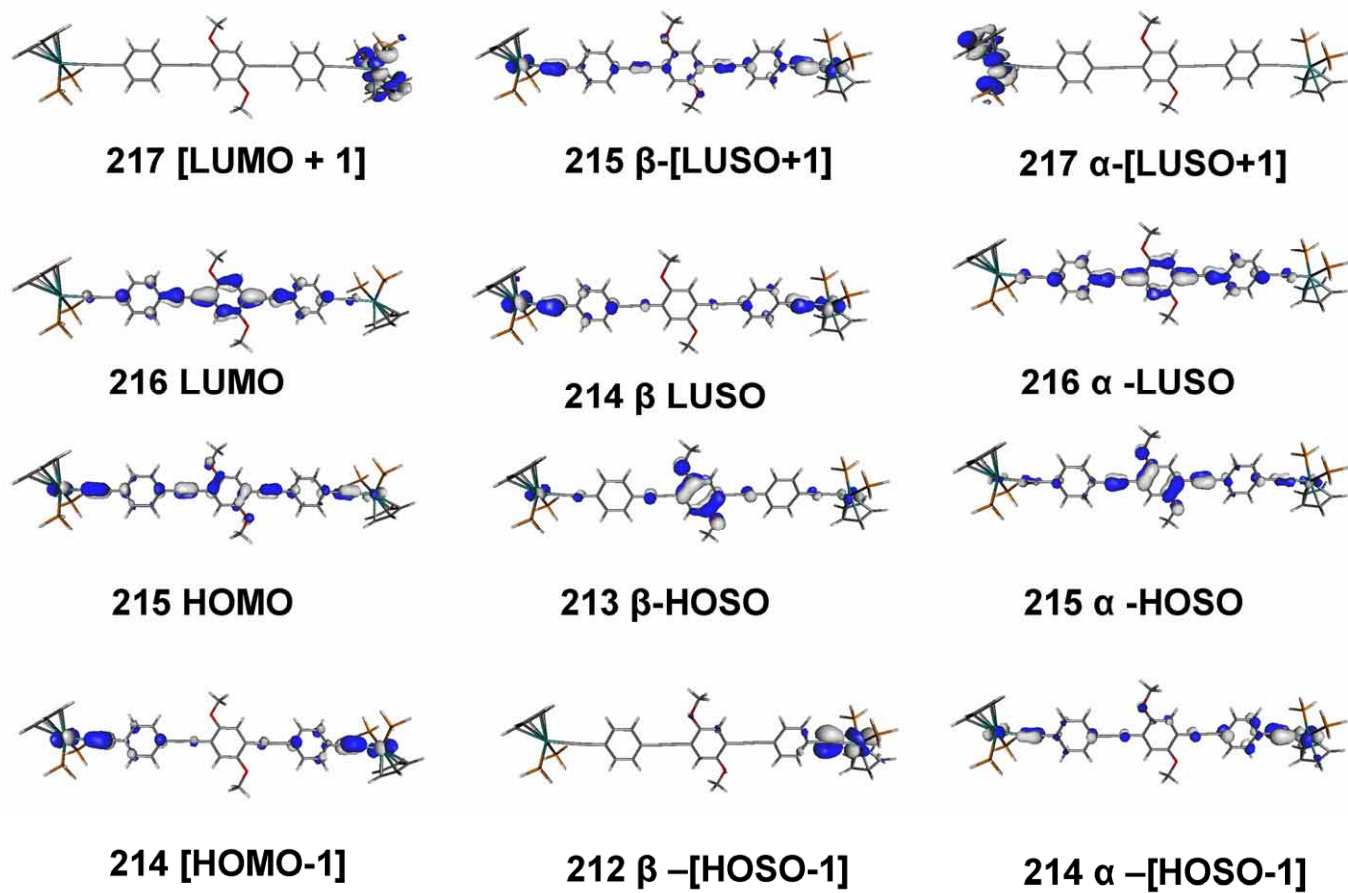

**Figure S1:** The frontier orbitals of  $[4\text{-H}]^{n+}$  ( $n = 0, 2$ ) plotted with contour values  $\pm 0.04$  ( $\text{e}/\text{bohr}^3$ )<sup>1/2</sup>.

**Table S1.** Energies and compositions of frontier orbitals in the model complex **4-H**

| MO  | eV     | Cp    | PH <sub>3</sub> | Ru | C1 | C2 | C <sub>6</sub> H <sub>4</sub> | C9 | C10 | C <sub>6</sub> H <sub>2</sub> (OMe) <sub>2</sub> | C10' | C9' | C <sub>6</sub> H <sub>4</sub> ' | C2' | C1' | Ru' | Cp' | PH <sub>3</sub> ' |   |
|-----|--------|-------|-----------------|----|----|----|-------------------------------|----|-----|--------------------------------------------------|------|-----|---------------------------------|-----|-----|-----|-----|-------------------|---|
| 220 | LUMO+4 | -0.24 | 0               | 0  | 0  | 0  | 0                             | 0  | 0   | 0                                                | 0    | 0   | 0                               | 1   | 8   | 61  | 17  | 13                |   |
| 219 | LUMO+3 | -0.39 | 0               | 1  | 2  | 6  | 0                             | 31 | 6   | 1                                                | 5    | 1   | 6                               | 31  | 1   | 6   | 2   | 1                 | 1 |
| 218 | LUMO+2 | -0.76 | 24              | 27 | 50 | 0  | 0                             | 0  | 0   | 0                                                | 0    | 0   | 0                               | 0   | 0   | 0   | 0   | 0                 | 0 |
| 217 | LUMO+1 | -0.86 | 0               | 0  | 0  | 0  | 0                             | 0  | 0   | 0                                                | 0    | 0   | 0                               | 0   | 0   | 50  | 24  | 27                |   |
| 216 | LUMO   | -1.34 | 0               | 0  | 1  | 3  | 0                             | 16 | 4   | 8                                                | 37   | 8   | 4                               | 16  | 0   | 3   | 1   | 0                 | 0 |
| 215 | HOMO   | -4.41 | 1               | 1  | 7  | 5  | 5                             | 14 | 4   | 4                                                | 22   | 4   | 4                               | 12  | 4   | 5   | 6   | 1                 | 0 |
| 214 | HOMO-1 | -4.78 | 3               | 1  | 14 | 6  | 10                            | 12 | 3   | 0                                                | 3    | 0   | 2                               | 13  | 10  | 6   | 13  | 3                 | 1 |
| 213 | HOMO-2 | -5.18 | 4               | 2  | 22 | 4  | 12                            | 3  | 0   | 2                                                | 32   | 2   | 0                               | 3   | 4   | 1   | 7   | 2                 | 1 |
| 212 | HOMO-3 | -5.27 | 4               | 3  | 40 | 7  | 17                            | 3  | 0   | 1                                                | 17   | 1   | 0                               | 1   | 1   | 0   | 3   | 1                 | 0 |
| 211 | HOMO-4 | -5.38 | 0               | 0  | 0  | 0  | 0                             | 0  | 0   | 0                                                | 1    | 0   | 0                               | 2   | 24  | 10  | 54  | 5                 | 4 |

**Table S2.** Energies and compositions of frontier orbitals in the model complex [**4H**]<sup>2+</sup>

| MO   | eV       | Cp     | PH <sub>3</sub> | Ru | C1 | C2 | C <sub>6</sub> H <sub>4</sub> | C9 | C10 | C <sub>6</sub> H <sub>2</sub> (OMe) <sub>2</sub> | C10' | C9' | C <sub>6</sub> H <sub>4</sub> ' | C2' | C1' | Ru' | Cp' | PH <sub>3</sub> ' |   |
|------|----------|--------|-----------------|----|----|----|-------------------------------|----|-----|--------------------------------------------------|------|-----|---------------------------------|-----|-----|-----|-----|-------------------|---|
| 218A | α-LUSO+2 | -5.15  | 0               | 0  | 0  | 0  | 0                             | 0  | 0   | 0                                                | 0    | 0   | 0                               | 0   | 0   | 48  | 26  | 26                |   |
| 217B | β-LUSO+3 | -5.22  | 25              | 26 | 49 | 0  | 0                             | 0  | 0   | 0                                                | 0    | 0   | 0                               | 0   | 0   | 0   | 0   | 0                 |   |
| 217A | α-LUSO+1 | -5.33  | 26              | 26 | 48 | 0  | 0                             | 0  | 0   | 0                                                | 0    | 0   | 0                               | 0   | 0   | 0   | 0   | 0                 |   |
| 216B | β-LUSO+2 | -5.54  | 0               | 0  | 2  | 4  | 0                             | 18 | 4   | 7                                                | 32   | 7   | 4                               | 16  | 0   | 4   | 2   | 0                 | 0 |
| 216A | α-LUSO   | -5.72  | 0               | 0  | 1  | 4  | 0                             | 20 | 4   | 6                                                | 30   | 6   | 4                               | 18  | 0   | 4   | 1   | 0                 | 0 |
| 215B | β-LUSO+1 | -7.63  | 2               | 1  | 10 | 4  | 6                             | 10 | 3   | 2                                                | 14   | 3   | 2                               | 13  | 8   | 5   | 12  | 2                 | 1 |
| 214B | β-LUSO   | -7.96  | 3               | 2  | 17 | 4  | 11                            | 13 | 3   | 0                                                | 4    | 0   | 3                               | 10  | 9   | 3   | 14  | 3                 | 2 |
| 215A | α-HOSO   | -8.75  | 1               | 0  | 2  | 3  | 2                             | 10 | 4   | 6                                                | 42   | 6   | 3                               | 12  | 2   | 3   | 4   | 1                 | 1 |
| 213B | β-HOSO   | -8.92  | 1               | 1  | 6  | 0  | 3                             | 4  | 0   | 4                                                | 59   | 5   | 0                               | 4   | 3   | 0   | 7   | 1                 | 1 |
| 214A | α-HOSO-1 | -9.34  | 2               | 1  | 7  | 3  | 5                             | 11 | 4   | 1                                                | 7    | 0   | 3                               | 16  | 11  | 5   | 16  | 5                 | 3 |
| 213A | α-HOSO-2 | -9.50  | 3               | 2  | 10 | 3  | 7                             | 11 | 0   | 0                                                | 52   | 0   | 2                               | 2   | 2   | 1   | 3   | 1                 | 1 |
| 212B | β-HOSO-1 | -9.79  | 0               | 0  | 0  | 0  | 0                             | 0  | 1   | 0                                                | 6    | 1   | 0                               | 4   | 24  | 8   | 49  | 4                 | 3 |
| 211B | β-HOSO-2 | -9.82  | 1               | 1  | 4  | 0  | 1                             | 5  | 4   | 3                                                | 46   | 4   | 3                               | 8   | 4   | 2   | 12  | 2                 | 1 |
| 212A | α-HOSO-3 | -9.91  | 0               | 0  | 0  | 0  | 0                             | 0  | 0   | 0                                                | 0    | 0   | 0                               | 3   | 25  | 9   | 55  | 5                 | 3 |
| 210B | β-HOSO-3 | -9.92  | 4               | 3  | 53 | 10 | 27                            | 3  | 0   | 0                                                | 0    | 0   | 0                               | 0   | 0   | 0   | 0   | 0                 | 0 |
| 211A | α-HOSO-4 | -10.05 | 6               | 3  | 53 | 9  | 25                            | 3  | 0   | 0                                                | 0    | 0   | 0                               | 0   | 0   | 0   | 0   | 0                 | 0 |
